# Supplementary material for: Fast track program in liver resection: a PRISMA-compliant systematic review and meta-analysis
Source: PubMed Central journal article supplement (PMC4956800; doi:10.1097/md.0000000000004154), 2016-07-18
Supplement: medi-95-e4154-s001.pdf [file medi-95-e4154-s001.pdf]

**Supplemental Digital Content**

**Supplemental Digital Content 1, Table** that illustrates the indications and extent of liver resection of the included studies.

**Supplemental Digital Content 2, Figure** that illustrates the Forest plot of comparison: Fast Track vs. Traditional Care, outcome: blood loss.

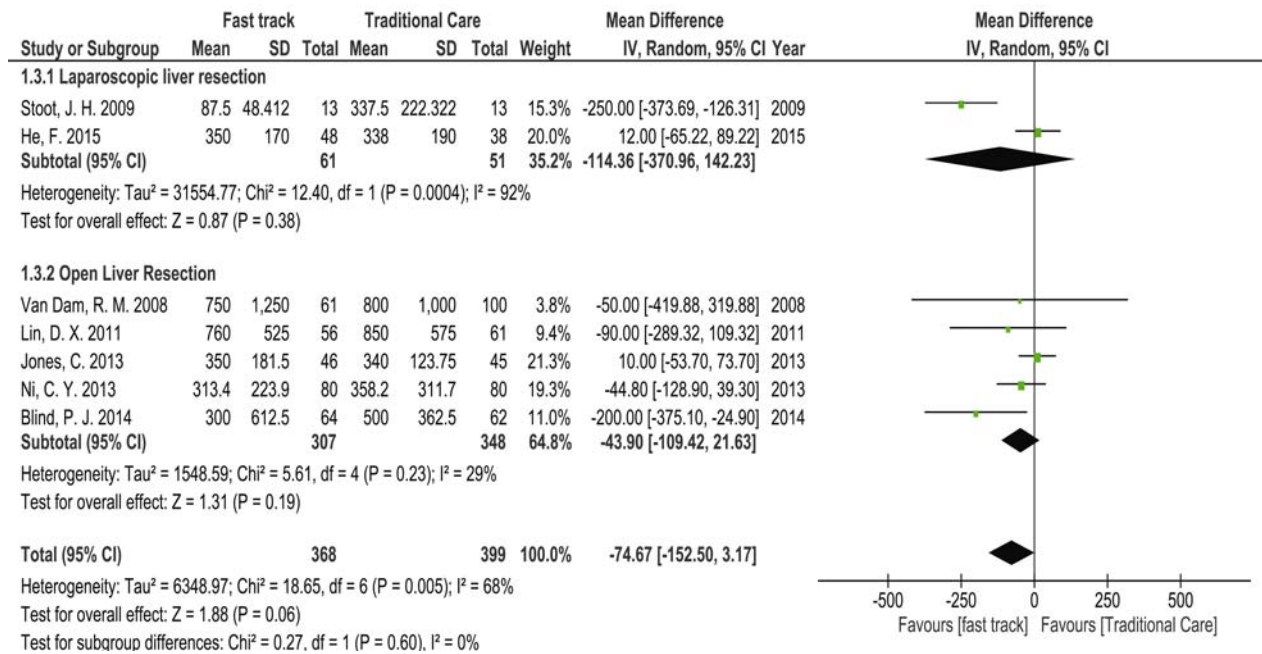

**Supplemental Digital Content 3, Figure** that illustrates the Forest plot of comparison: Fast Track vs. Traditional Care, outcome: need for blood transfusion.

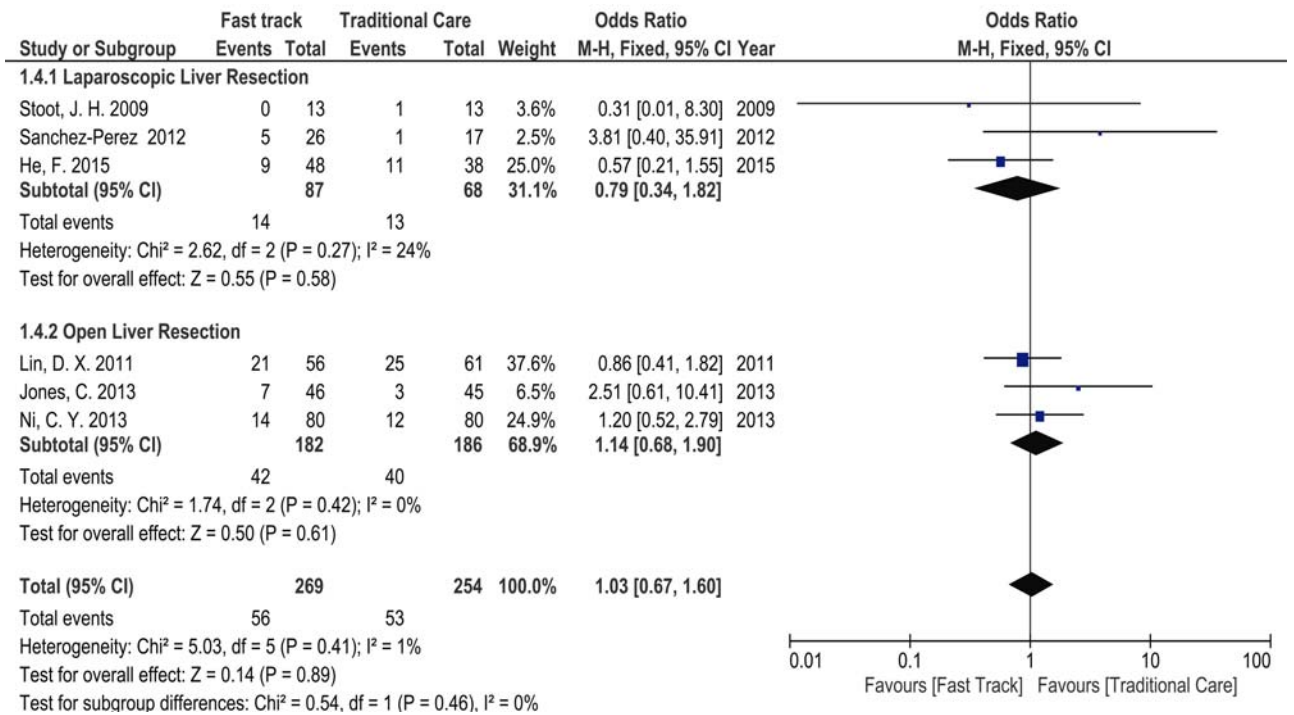

**Supplemental Digital Content 4, Figure** that illustrates the Forest plot of comparison: Fast Track vs. Traditional Care, outcome: conversion rate.

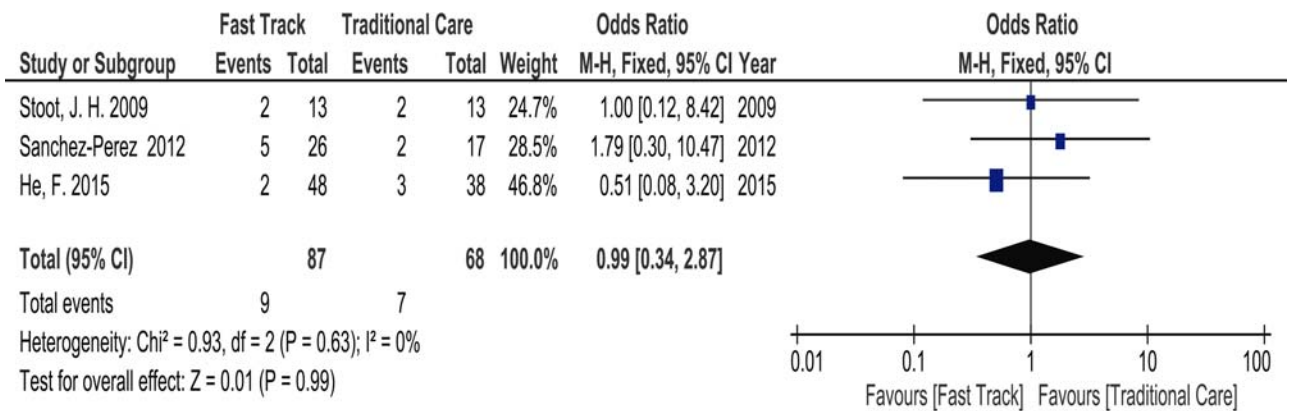

**Supplemental Digital Content 5, Figure** that illustrates the Forest plot of comparison: Fast Track vs. Traditional Care, outcome: mortality rate.

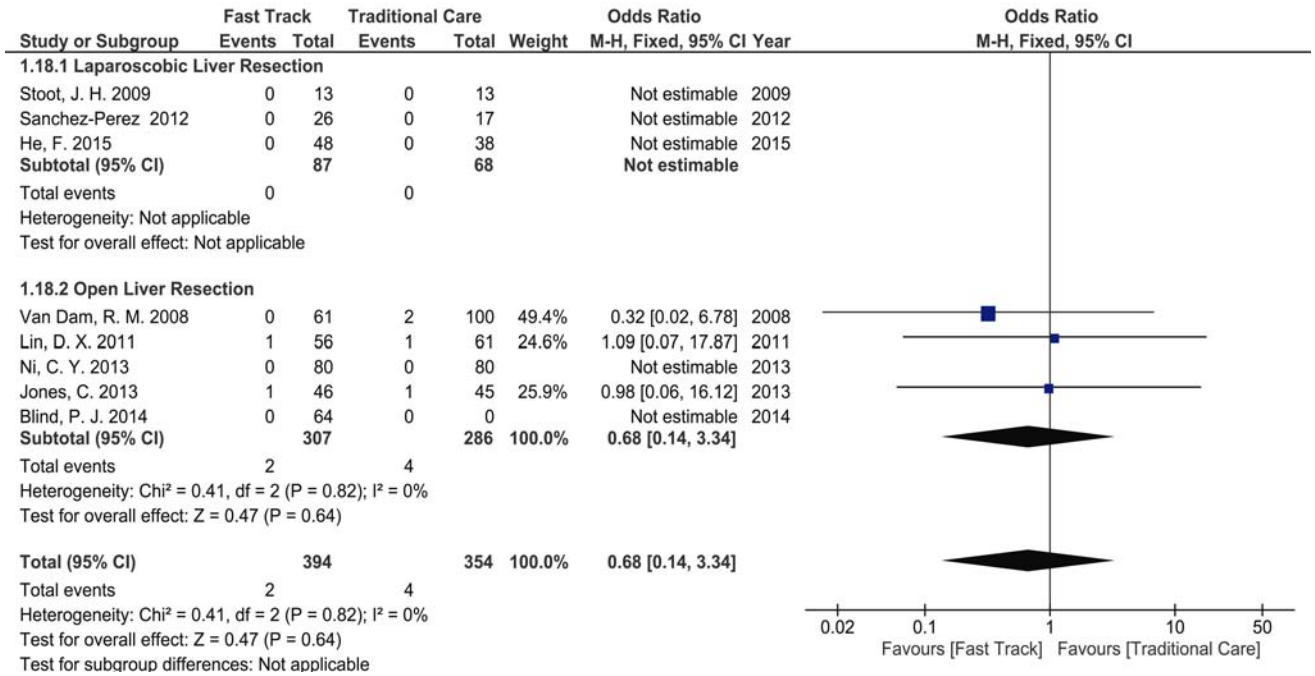

**Supplemental Digital Content 6, Figure** that illustrates the Forest plot of comparison: Fast Track vs. Traditional Care, outcome: readmission rate.

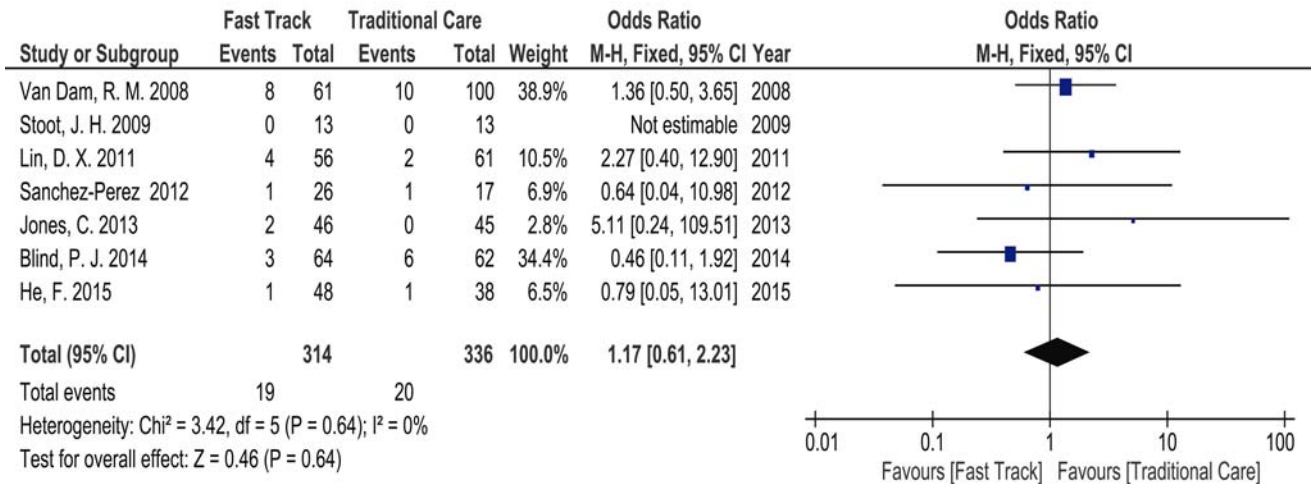

**Table 1:** Indications and extent of Liver Resection in each study.

|                          | Van Dam, 2008 |             | Stoot, 2009 |            | Lin, 2011  |            | Sanchez-P., 2012 |            | Ni, 2013   |            | Jones, 2013 |            | Blind, 2014 |            | He, 2015   |            |    |   |
|--------------------------|---------------|-------------|-------------|------------|------------|------------|------------------|------------|------------|------------|-------------|------------|-------------|------------|------------|------------|----|---|
|                          | FT<br>n=61    | TC<br>n=100 | FT<br>n=13  | TC<br>n=13 | FT<br>n=56 | TC<br>n=61 | FT<br>n=26       | TC<br>n=17 | FT<br>n=80 | TC<br>n=80 | FT<br>n=46  | TC<br>n=45 | FT<br>n=64  | TC<br>n=62 | FT<br>n=48 | TC<br>n=38 |    |   |
| <i>Indications</i>       |               |             |             |            |            |            |                  |            |            |            |             |            |             |            |            |            |    |   |
| Colorectal Metastasis    | 51            | 72          | 5           | 2          | NA         | NA         | 8                | 0          | 0          | 0          | 35          | 26         | 53          | 42         | 20         | 16         |    |   |
| Other Metastasis         | 2             | 4           |             |            | NA         | NA         | -                | -          | -          | -          | -           | -          | -           | -          | -          | -          | -  |   |
| Hepatocellular Carcinoma | 4             | 10          |             |            | NA         | NA         | 3                | 3          | 71         | 76         | 9           | 4          | 0           | 0          | 6          | 17         | 11 | 8 |
| Cholangiocarcinoma       |               |             |             |            | NA         | NA         | 1                | 0          |            |            |             |            | 0           | 0          | 0          | 0          | 0  | 0 |
| Benign Lesions           | 4             | 14          | 8           | 11         | NA         | NA         | 14               | 14         | 0          | 0          | 1           | 9          | 5           | 3          | 17         | 14         |    |   |
| <i>Resection</i>         |               |             |             |            |            |            |                  |            |            |            |             |            |             |            |            |            |    |   |
| segmentectomy            | 10            | 21          | 3           | 3          | 13         | 14         | 0                | 0          | 7          | 11         | 25          | 33         | NA          | NA         | 5          | 2          |    |   |
| Bisegmentectomy          | 0             | 0           | 9           | 9          | 17         | 17         | 5                | 4          | 0          | 0          | 0           | 0          | NA          | NA         | 43         | 36         |    |   |
| Wedge Resection          | 0             | 0           | 0           | 0          | 7          | 9          | 12               | 7          | 0          | 0          | 0           | 0          | NA          | NA         | 0          | 0          |    |   |
| Major Resection          | 51            | 79          | 1           | 1          | 19         | 21         | 0                | 0          | 73         | 69         | 21          | 12         | 22          | 26         | 0          | 0          |    |   |
| Others                   | 0             | 0           | 0           | 0          | 0          | 0          | 9                | 6          | 0          | 0          | 0           | 0          | NA          | NA         | 0          | 0          |    |   |

NA: Not Available.
